# Supplementary material for: Gender bias in sports medicine: an international assessment of sports medicine physicians’ perceptions of their interactions with athletes, coaches, athletic trainers and other physicians
Source: HighWire-hosted journal article supplement (doi:10.1136/bjsports-2021-104695), 2022-06-23
Supplement: bjsports-2021-104695supp001_data_supplement.pdf [file bjsports-2021-104695supp001_data_supplement.pdf]

Table 1. Results of ordinal logistic regression analysis on disrespectful attitudes (both genders combined)

| Male athletes      |                    | Odds Ratio | 95% CI      | p value |
|--------------------|--------------------|------------|-------------|---------|
| Gender             |                    |            |             |         |
|                    | Male               | Base       |             |         |
|                    | Female             | 1.27       | [0.97,1.66] | 0.077   |
| Age                |                    | 0.99       | [0.98,0.99] | 0.044   |
| Region             |                    |            |             |         |
|                    | Europe             | Base       |             |         |
|                    | Africa             | 1.81       | [0.88,3.70] | 0.106   |
|                    | Asia               | 0.60       | [0.41,0.86] | 0.005   |
|                    | North America      | 1.51       | [1.07,2.13] | 0.020   |
|                    | Oceania            | 1.26       | [0.33,4.83] | 0.741   |
|                    | South America      | 1.18       | [0.59,2.37] | 0.636   |
|                    | Multiple           | 0.38       | [0.04,4.06] | 0.422   |
| Residency training |                    |            |             |         |
|                    | Family Medicine    | Base       |             |         |
|                    | Orthopedics        | 0.73       | [0.49,1.09] | 0.123   |
|                    | Internal Medicine  | 0.57       | [0.32,1.02] | 0.059   |
|                    | PM&R               | 0.78       | [0.51,1.19] | 0.244   |
|                    | Pediatrics         | 0.89       | [0.48,1.67] | 0.723   |
|                    | Emergency Medicine | 0.49       | [0.25,0.97] | 0.039   |
|                    | Sports Medicine    | 1.21       | [0.68,2.15] | 0.524   |
|                    | Other              | 0.87       | [0.45,1.69] | 0.680   |
| Female athletes    |                    | Odds Ratio | 95% CI      | p value |
| Gender             |                    |            |             |         |
|                    | Male               | Base       |             |         |
|                    | Female             | 0.81       | [0.61,1.06] | 0.127   |
| Age                |                    | 0.99       | [0.98,1.00] | 0.173   |
| Region             |                    |            |             |         |
|                    | Europe             | Base       |             |         |
|                    | Africa             | 2.25       | [1.09,4.65] | 0.029   |
|                    | Asia               | 0.60       | [0.40,0.88] | 0.009   |
|                    | North America      | 1.40       | [0.98,1.99] | 0.061   |
|                    | Oceania            | 1.09       | [0.26,4.63] | 0.907   |
|                    | South America      | 0.89       | [0.42,1.88] | 0.767   |
|                    | Multiple           | 0.53       | [0.05,5.72] | 0.601   |
| Residency training |                    |            |             |         |
|                    | Family Medicine    | Base       |             |         |
|                    | Orthopedics        | 0.60       | [0.39,0.90] | 0.014   |
|                    | Internal Medicine  | 0.99       | [0.56,1.74] | 0.977   |
|                    | PM&R               | 0.81       | [0.53,1.25] | 0.345   |
|                    | Pediatrics         | 1.07       | [0.57,1.99] | 0.842   |
|                    | Emergency Medicine | 0.63       | [0.32,1.23] | 0.178   |
|                    | Sports Medicine    | 1.03       | [0.57,1.86] | 0.934   |
|                    | Other              | 0.64       | [0.31,1.34] | 0.237   |
| Male coaches       |                    | Odds Ratio | 95% CI      | p value |
| Gender             |                    |            |             |         |
|                    | Male               | Base       |             |         |

|                    |                                    |            |             |         |
|--------------------|------------------------------------|------------|-------------|---------|
|                    | Female                             | 1.96       | [1.49,2.57] | < 0.001 |
| Age                |                                    | 0.99       | [0.98,1.01] | 0.349   |
| Region             |                                    |            |             |         |
|                    | Europe                             | Base       |             |         |
|                    | Africa                             | 2.97       | [1.45,6.10] | 0.003   |
|                    | Asia                               | 0.60       | [0.42,0.86] | 0.006   |
|                    | North America                      | 1.25       | [0.88,1.77] | 0.219   |
|                    | Oceania                            | 1.97       | [0.51,7.57] | 0.324   |
|                    | South America                      | 0.94       | [0.47,1.89] | 0.860   |
|                    | Multiple                           | 0.32       | [0.03,3.42] | 0.344   |
| Residency training |                                    |            |             |         |
|                    | Family Medicine                    | Base       |             |         |
|                    | Orthopedics                        | 0.61       | [0.41,0.91] | 0.016   |
|                    | Internal Medicine                  | 0.63       | [0.36,1.09] | 0.100   |
|                    | PM&R                               | 0.54       | [0.35,0.83] | 0.005   |
|                    | Pediatrics                         | 0.76       | [0.42,1.38] | 0.370   |
|                    | Emergency Medicine                 | 0.26       | [0.13,0.52] | < 0.001 |
|                    | Sports Medicine                    | 1.23       | [0.68,2.22] | 0.495   |
|                    | Other                              | 0.57       | [0.28,1.16] | 0.121   |
|                    | Female coaches                     | Odds Ratio | 95% CI      | p value |
| Gender             |                                    |            |             |         |
|                    | Male                               | Base       |             |         |
|                    | Female                             | 1.01       | [0.76,1.35] | 0.927   |
| Age                |                                    | 1.00       | [0.99,1.02] | 0.471   |
| Region             |                                    |            |             |         |
|                    | Europe                             | Base       |             |         |
|                    | Africa                             | 4.53       | [2.26,9.08] | < 0.001 |
|                    | Asia                               | 1.01       | [0.67,1.52] | 0.959   |
|                    | North America                      | 1.50       | [1.03,2.18] | 0.036   |
|                    | Oceania                            | 1.26       | [0.30,5.29] | 0.756   |
|                    | South America                      | 1.37       | [0.64,2.93] | 0.413   |
|                    | Multiple                           | 0.77       | [0.07,8.26] | 0.826   |
| Residency training |                                    |            |             |         |
|                    | Family Medicine                    | Base       |             |         |
|                    | Orthopedics                        | 0.47       | [0.31,0.73] | 0.001   |
|                    | Internal Medicine                  | 0.75       | [0.42,1.34] | 0.326   |
|                    | PM&R                               | 0.75       | [0.48,1.17] | 0.208   |
|                    | Pediatrics                         | 0.70       | [0.37,1.34] | 0.283   |
|                    | Emergency Medicine                 | 0.39       | [0.17,0.86] | 0.019   |
|                    | Sports Medicine                    | 1.21       | [0.65,2.24] | 0.547   |
|                    | Other                              | 0.65       | [0.32,1.34] | 0.243   |
|                    | Male physicians in practice longer | Odds Ratio | 95% CI      | p value |
| Gender             |                                    |            |             |         |
|                    | Male                               | Base       |             |         |
|                    | Female                             | 2.42       | [1.85,3.17] | < 0.001 |
| Age                |                                    | 0.96       | [0.95,0.97] | < 0.001 |
| Region             |                                    |            |             |         |
|                    | Europe                             | Base       |             |         |
|                    | Africa                             | 4.00       | [2.03,7.90] | < 0.001 |
|                    | Asia                               | 0.92       | [0.63,1.32] | 0.637   |

|                                              |                    |            |             |         |
|----------------------------------------------|--------------------|------------|-------------|---------|
|                                              | North America      | 1.98       | [1.34,2.93] | 0.001   |
|                                              | Oceania            | 0.06       | [0.01,0.56] | 0.014   |
|                                              | South America      | 1.80       | [0.91,3.56] | 0.093   |
|                                              | Multiple           | 0.43       | [0.04,4.72] | 0.488   |
| Residency training                           |                    |            |             |         |
|                                              | Family Medicine    | Base       |             |         |
|                                              | Orthopedics        | 1.62       | [1.07,2.46] | 0.024   |
|                                              | Internal Medicine  | 0.92       | [0.51,1.66] | 0.785   |
|                                              | PM&R               | 0.95       | [0.61,1.46] | 0.807   |
|                                              | Pediatrics         | 1.50       | [0.81,2.78] | 0.199   |
|                                              | Emergency Medicine | 1.42       | [0.75,2.70] | 0.284   |
|                                              | Sports Medicine    | 1.89       | [1.03,3.48] | 0.041   |
|                                              | Other              | 1.95       | [1.01,3.78] | 0.046   |
| Male physicians in practice the same or less |                    |            |             |         |
|                                              |                    | Odds Ratio | 95% CI      | p value |
| Gender                                       |                    |            |             |         |
|                                              | Male               | Base       |             |         |
|                                              | Female             | 2.36       | [1.80,3.11] | < 0.001 |
| Age                                          |                    | 1.00       | [0.99,1.01] | 0.504   |
| Region                                       |                    |            |             |         |
|                                              | Europe             | Base       |             |         |
|                                              | Africa             | 2.15       | [1.03,4.48] | 0.042   |
|                                              | Asia               | 0.87       | [0.60,1.26] | 0.459   |
|                                              | North America      | 1.31       | [0.91,1.89] | 0.148   |
|                                              | Oceania            | 1.14       | [0.27,4.73] | 0.860   |
|                                              | South America      | 0.92       | [0.44,1.93] | 0.830   |
|                                              | Multiple           | 0.76       | [0.07,8.03] | 0.819   |
| Residency training                           |                    |            |             |         |
|                                              | Family Medicine    | Base       |             |         |
|                                              | Orthopedics        | 1.10       | [0.73,1.67] | 0.636   |
|                                              | Internal Medicine  | 0.62       | [0.34,1.13] | 0.116   |
|                                              | PM&R               | 0.69       | [0.45,1.07] | 0.100   |
|                                              | Pediatrics         | 1.19       | [0.64,2.22] | 0.581   |
|                                              | Emergency Medicine | 1.51       | [0.77,2.96] | 0.230   |
|                                              | Sports Medicine    | 0.92       | [0.50,1.70] | 0.798   |
|                                              | Other              | 1.16       | [0.60,2.26] | 0.660   |
| Female physicians in practice longer         |                    |            |             |         |
|                                              |                    | Odds Ratio | 95% CI      | p value |
| Gender                                       |                    |            |             |         |
|                                              | Male               | Base       |             |         |
|                                              | Female             | 1.00       | [0.75,1.32] | 0.996   |
| Age                                          |                    | 0.96       | [0.95,0.97] | < 0.001 |
| Region                                       |                    |            |             |         |
|                                              | Europe             | Base       |             |         |
|                                              | Africa             | 3.48       | [1.69,7.17] | 0.001   |
|                                              | Asia               | 0.70       | [0.47,1.04] | 0.076   |
|                                              | North America      | 1.20       | [0.82,1.74] | 0.348   |
|                                              | Oceania            | 0.46       | [0.08,2.55] | 0.371   |
|                                              | South America      | 0.52       | [0.22,1.21] | 0.128   |
|                                              | Multiple           | 0.72       | [0.07,7.87] | 0.789   |
| Residency training                           |                    |            |             |         |
|                                              | Family Medicine    | Base       |             |         |

|                                                |            |              |         |
|------------------------------------------------|------------|--------------|---------|
| Orthopedics                                    | 1.07       | [0.69,1.66]  | 0.748   |
| Internal Medicine                              | 0.93       | [0.51,1.69]  | 0.804   |
| PM&R                                           | 1.02       | [0.66,1.59]  | 0.921   |
| Pediatrics                                     | 1.30       | [0.68,2.51]  | 0.430   |
| Emergency Medicine                             | 0.93       | [0.46,1.89]  | 0.839   |
| Sports Medicine                                | 1.14       | [0.60,2.14]  | 0.689   |
| Other                                          | 1.21       | [0.58,2.53]  | 0.608   |
| Female physicians in practice the same or less | Odds Ratio | 95% CI       | p value |
| Gender                                         |            |              |         |
| Male                                           | Base       |              |         |
| Female                                         | 0.76       | [0.56,1.04]  | 0.083   |
| Age                                            | 0.98       | [0.97,1.00]  | 0.018   |
| Region                                         |            |              |         |
| Europe                                         | Base       |              |         |
| Africa                                         | 3.12       | [1.46,6.64]  | 0.003   |
| Asia                                           | 0.83       | [0.55,1.26]  | 0.375   |
| North America                                  | 1.22       | [0.81,1.84]  | 0.337   |
| Oceania                                        | n.c.       |              |         |
| South America                                  | 1.10       | [0.50,2.42]  | 0.821   |
| Multiple                                       | 1.17       | [0.11,12.21] | 0.898   |
| Residency training                             |            |              |         |
| Family Medicine                                | Base       |              |         |
| Orthopedics                                    | 1.19       | [0.75,1.89]  | 0.466   |
| Internal Medicine                              | 0.84       | [0.42,1.66]  | 0.616   |
| PM&R                                           | 1.27       | [0.79,2.04]  | 0.326   |
| Pediatrics                                     | 1.69       | [0.86,3.35]  | 0.130   |
| Emergency Medicine                             | 1.90       | [0.94,3.83]  | 0.073   |
| Sports Medicine                                | 1.11       | [0.56,2.18]  | 0.771   |
| Other                                          | 1.44       | [0.67,3.10]  | 0.355   |
| Male athletic trainers                         | Odds Ratio | 95% CI       | p value |
| Gender                                         |            |              |         |
| Male                                           | Base       |              |         |
| Female                                         | 1.70       | [1.29,2.24]  | < 0.001 |
| Age                                            | 1.00       | [0.98,1.01]  | 0.424   |
| Region                                         |            |              |         |
| Europe                                         | Base       |              |         |
| Africa                                         | 3.89       | [1.94,7.83]  | < 0.001 |
| Asia                                           | 0.70       | [0.48,1.02]  | 0.065   |
| North America                                  | 1.12       | [0.77,1.62]  | 0.551   |
| Oceania                                        | 0.89       | [0.22,3.63]  | 0.871   |
| South America                                  | 1.14       | [0.55,2.36]  | 0.729   |
| Multiple                                       | n.c.       |              |         |
| Residency training                             |            |              |         |
| Family Medicine                                | Base       |              |         |
| Orthopedics                                    | 0.81       | [0.53,1.23]  | 0.315   |
| Internal Medicine                              | 0.64       | [0.35,1.16]  | 0.144   |
| PM&R                                           | 0.90       | [0.58,1.40]  | 0.649   |
| Pediatrics                                     | 0.72       | [0.38,1.37]  | 0.314   |
| Emergency Medicine                             | 0.43       | [0.21,0.90]  | 0.026   |
| Sports Medicine                                | 1.22       | [0.67,2.23]  | 0.521   |

|                               |                    |            |             |         |
|-------------------------------|--------------------|------------|-------------|---------|
|                               | Other              | 1.08       | [0.53,2.19] | 0.836   |
| Female athletic trainers      |                    | Odds Ratio | 95% CI      | p value |
| Gender                        |                    |            |             |         |
|                               | Male               | Base       |             |         |
|                               | Female             | 1.16       | [0.86,1.57] | 0.328   |
| Age                           |                    |            |             |         |
|                               |                    | 1.00       | [0.99,1.01] | 0.757   |
| Region                        |                    |            |             |         |
|                               | Europe             | Base       |             |         |
|                               | Africa             | 4.18       | [1.99,8.79] | < 0.001 |
|                               | Asia               | 0.77       | [0.50,1.18] | 0.230   |
|                               | North America      | 1.34       | [0.90,2.02] | 0.152   |
|                               | Oceania            | 0.34       | [0.04,3.00] | 0.330   |
|                               | South America      | 2.04       | [0.99,4.2]  | 0.055   |
|                               | Multiple           | n.c.       |             |         |
| Residency training            |                    |            |             |         |
|                               | Family Medicine    | Base       |             |         |
|                               | Orthopedics        | 0.79       | [0.50,1.25] | 0.305   |
|                               | Internal Medicine  | 0.42       | [0.20,0.85] | 0.017   |
|                               | PM&R               | 1.01       | [0.63,1.61] | 0.970   |
|                               | Pediatrics         | 0.98       | [0.50,1.93] | 0.953   |
|                               | Emergency Medicine | 0.59       | [0.27,1.30] | 0.189   |
|                               | Sports Medicine    | 1.10       | [0.56,2.13] | 0.789   |
|                               | Other              | 0.96       | [0.44,2.11] | 0.921   |
| Organizations/Administrations |                    | Odds Ratio | 95% CI      | p value |
| Gender                        |                    |            |             |         |
|                               | Male               | Base       |             |         |
|                               | Female             | 1.48       | [1.12,1.94] | 0.005   |
| Age                           |                    |            |             |         |
|                               |                    | 1.00       | [0.98,1.01] | 0.472   |
| Region                        |                    |            |             |         |
|                               | Europe             | Base       |             |         |
|                               | Africa             | 2.42       | [1.18,4.97] | 0.016   |
|                               | Asia               | 0.79       | [0.55,1.15] | 0.220   |
|                               | North America      | 1.03       | [0.72,1.48] | 0.865   |
|                               | Oceania            | 1.04       | [0.28,3.81] | 0.954   |
|                               | South America      | 2.21       | [1.13,4.34] | 0.021   |
|                               | Multiple           | 0.83       | [0.08,9.19] | 0.880   |
| Residency training            |                    |            |             |         |
|                               | Family Medicine    | Base       |             |         |
|                               | Orthopedics        | 0.75       | [0.50,1.12] | 0.160   |
|                               | Internal Medicine  | 0.73       | [0.42,1.29] | 0.283   |
|                               | PM&R               | 0.59       | [0.38,0.92] | 0.021   |
|                               | Pediatrics         | 0.74       | [0.40,1.36] | 0.329   |
|                               | Emergency Medicine | 0.48       | [0.23,0.99] | 0.046   |
|                               | Sports Medicine    | 1.70       | [0.95,3.05] | 0.073   |
|                               | Other              | 1.06       | [0.54,2.07] | 0.866   |

PM&R; physical medicine and rehabilitation, 95 % CI; 95 % confidence interval, n.c; not calculated

Table 2 Results of ordinal logistic regression analysis on having felt disrespected or their judgment questioned (both genders separately)

| Female sports medicine physicians |            |               |         |
|-----------------------------------|------------|---------------|---------|
| Male athletes                     | Odds Ratio | 95% CI        | p value |
| Age                               | 1.01       | [0.99,1.04]   | 0.301   |
| Region                            |            |               |         |
| Europe                            | Base       |               |         |
| Africa                            | 3.24       | [1.14,9.19]   | 0.027   |
| Asia                              | 0.61       | [0.28,1.35]   | 0.224   |
| North America                     | 2.36       | [1.25,4.47]   | 0.008   |
| Oceania                           | 3.26       | [0.42,25.44]  | 0.260   |
| South America                     | 0.23       | [0.02,2.14]   | 0.196   |
| Residency training                |            |               |         |
| Family Medicine                   | Base       |               |         |
| Orthopedics                       | 0.80       | [0.37,1.72]   | 0.571   |
| Internal Medicine                 | 0.64       | [0.23,1.81]   | 0.400   |
| PM&R                              | 0.89       | [0.47,1.66]   | 0.710   |
| Pediatrics                        | 0.73       | [0.33,1.60]   | 0.426   |
| Emergency Medicine                | 0.96       | [0.38,2.46]   | 0.938   |
| Sports Medicine                   | 0.80       | [0.28,2.31]   | 0.683   |
| Other                             | 2.40       | [0.61,9.34]   | 0.208   |
| Female athletes                   | Odds Ratio | 95% CI        | p value |
| Age                               | 1.02       | [0.99,1.04]   | 0.137   |
| Region                            |            |               |         |
| Europe                            | Base       |               |         |
| Africa                            | 2.85       | [0.95,8.54]   | 0.061   |
| Asia                              | 0.88       | [0.38,2.02]   | 0.764   |
| North America                     | 1.64       | [0.86,3.12]   | 0.135   |
| Oceania                           | 7.18       | [0.85,60.46]  | 0.070   |
| South America                     | 0.36       | [0.04,3.38]   | 0.368   |
| Residency training                |            |               |         |
| Family Medicine                   | Base       |               |         |
| Orthopedics                       | 0.84       | [0.38,1.87]   | 0.665   |
| Internal Medicine                 | 1.15       | [0.41,3.26]   | 0.791   |
| PM&R                              | 0.89       | [0.47,1.70]   | 0.732   |
| Pediatrics                        | 1.21       | [0.55,2.68]   | 0.633   |
| Emergency Medicine                | 1.63       | [0.64,4.17]   | 0.307   |
| Sports Medicine                   | 0.77       | [0.26,2.25]   | 0.628   |
| Other                             | 1.06       | [0.22,5.22]   | 0.939   |
| Male coaches                      | Odds Ratio | 95% CI        | p value |
| Age                               | 1.01       | [0.99,1.03]   | 0.464   |
| Region                            |            |               |         |
| Europe                            | Base       |               |         |
| Africa                            | 4.37       | [1.53,12.51]  | 0.006   |
| Asia                              | 0.76       | [0.35,1.64]   | 0.487   |
| North America                     | 1.25       | [0.66,2.37]   | 0.486   |
| Oceania                           | 14.58      | [2.09,101.54] | 0.007   |
| South America                     | 0.17       | [0.02,1.67]   | 0.128   |
| Residency training                |            |               |         |
| Family Medicine                   | Base       |               |         |

|                                              |            |              |         |
|----------------------------------------------|------------|--------------|---------|
| Orthopedics                                  | 0.46       | [0.22,0.99]  | 0.046   |
| Internal Medicine                            | 0.38       | [0.15,0.99]  | 0.048   |
| PM&R                                         | 0.42       | [0.21,0.80]  | 0.009   |
| Pediatrics                                   | 0.55       | [0.26,1.15]  | 0.112   |
| Emergency Medicine                           | 0.30       | [0.11,0.81]  | 0.018   |
| Sports Medicine                              | 0.38       | [0.13,1.09]  | 0.073   |
| Other                                        | 0.31       | [0.07,1.45]  | 0.138   |
| Female coaches                               | Odds Ratio | 95% CI       | p value |
| Age                                          | 1.02       | [0.99,1.04]  | 0.226   |
| Region                                       |            |              |         |
| Europe                                       | Base       |              |         |
| Africa                                       | 4.60       | [1.59,13.28] | 0.005   |
| Asia                                         | 1.75       | [0.77,3.98]  | 0.182   |
| North America                                | 1.45       | [0.73,2.88]  | 0.286   |
| Oceania                                      | 8.05       | [0.99,65.53] | 0.051   |
| South America                                | 0.54       | [0.06,5.11]  | 0.589   |
| Residency training                           |            |              |         |
| Family Medicine                              | Base       |              |         |
| Orthopedics                                  | 0.46       | [0.20,1.04]  | 0.061   |
| Internal Medicine                            | 0.57       | [0.20,1.67]  | 0.305   |
| PM&R                                         | 0.80       | [0.41,1.54]  | 0.501   |
| Pediatrics                                   | 0.68       | [0.30,1.53]  | 0.347   |
| Emergency Medicine                           | 0.57       | [0.18,1.75]  | 0.324   |
| Sports Medicine                              | 0.59       | [0.18,1.89]  | 0.375   |
| Other                                        | 1.37       | [0.30,6.19]  | 0.684   |
| Male physicians in practice longer           | Odds Ratio | 95% CI       | p value |
| Age                                          | 0.98       | [0.96,1.00]  | 0.126   |
| Region                                       |            |              |         |
| Europe                                       | Base       |              |         |
| Africa                                       | 5.63       | [2.01,15.75] | 0.001   |
| Asia                                         | 0.97       | [0.47,2.03]  | 0.943   |
| North America                                | 3.66       | [1.84,7.29]  | < 0.001 |
| Oceania                                      | n.c.       |              |         |
| South America                                | 1.05       | [0.13,8.85]  | 0.962   |
| Residency training                           |            |              |         |
| Family Medicine                              | Base       |              |         |
| Orthopedics                                  | 2.71       | [1.30,5.64]  | 0.008   |
| Internal Medicine                            | 0.59       | [0.21,1.69]  | 0.324   |
| PM&R                                         | 0.79       | [0.43,1.47]  | 0.464   |
| Pediatrics                                   | 0.92       | [0.43,1.96]  | 0.829   |
| Emergency Medicine                           | 2.15       | [0.90,5.15]  | 0.085   |
| Sports Medicine                              | 1.86       | [0.64,5.40]  | 0.255   |
| Other                                        | 4.42       | [1.21,16.17] | 0.025   |
| Male physicians in practice the same or less | Odds Ratio | 95% CI       | p value |
| Age                                          | 1.01       | [0.99,1.03]  | 0.275   |
| Region                                       |            |              |         |
| Europe                                       | Base       |              |         |
| Africa                                       | 1.12       | [0.38,3.28]  | 0.843   |
| Asia                                         | 0.80       | [0.38,1.69]  | 0.554   |
| North America                                | 1.44       | [0.77,2.71]  | 0.254   |
| Oceania                                      | 3.10       | [0.44,21.77] | 0.255   |

|                    |                                                |            |              |         |
|--------------------|------------------------------------------------|------------|--------------|---------|
|                    | South America                                  | 0.72       | [0.11,4.79]  | 0.734   |
| Residency training |                                                |            |              |         |
|                    | Family Medicine                                | Base       |              |         |
|                    | Orthopedics                                    | 0.85       | [0.40,1.81]  | 0.675   |
|                    | Internal Medicine                              | 0.41       | [0.15,1.12]  | 0.082   |
|                    | PM&R                                           | 0.44       | [0.23,0.83]  | 0.012   |
|                    | Pediatrics                                     | 0.99       | [0.47,2.10]  | 0.987   |
|                    | Emergency Medicine                             | 1.45       | [0.56,3.78]  | 0.447   |
|                    | Sports Medicine                                | 0.53       | [0.19,1.48]  | 0.224   |
|                    | Other                                          | 1.84       | [0.52,6.42]  | 0.342   |
|                    | Female physicians in practice longer           | Odds Ratio | 95% CI       | p value |
| Age                |                                                | 0.98       | [0.95,1.00]  | 0.062   |
| Region             |                                                |            |              |         |
|                    | Europe                                         | Base       |              |         |
|                    | Africa                                         | 4.95       | [1.65,14.91] | 0.004   |
|                    | Asia                                           | 1.35       | [0.62,2.93]  | 0.453   |
|                    | North America                                  | 1.59       | [0.84,3.03]  | 0.156   |
|                    | Oceania                                        | n.c.       |              |         |
|                    | South America                                  | 0.44       | [0.05,4.11]  | 0.469   |
| Residency training |                                                |            |              |         |
|                    | Family Medicine                                | Base       |              |         |
|                    | Orthopedics                                    | 1.51       | [0.70,3.27]  | 0.296   |
|                    | Internal Medicine                              | 0.92       | [0.34,2.51]  | 0.878   |
|                    | PM&R                                           | 1.13       | [0.60,2.14]  | 0.701   |
|                    | Pediatrics                                     | 1.15       | [0.51,2.59]  | 0.744   |
|                    | Emergency Medicine                             | 1.23       | [0.45,3.36]  | 0.685   |
|                    | Sports Medicine                                | 0.88       | [0.29,2.63]  | 0.817   |
|                    | Other                                          | 3.10       | [0.77,12.58] | 0.113   |
|                    | Female physicians in practice the same or less | Odds Ratio | 95% CI       | p value |
| Age                |                                                | 0.99       | [0.97,1.02]  | 0.710   |
| Region             |                                                |            |              |         |
|                    | Europe                                         | Base       |              |         |
|                    | Africa                                         | 4.49       | [1.37,14.76] | 0.013   |
|                    | Asia                                           | 1.43       | [0.59,3.50]  | 0.429   |
|                    | North America                                  | 1.83       | [0.84,4.02]  | 0.130   |
|                    | Oceania                                        | n.c.       |              |         |
|                    | South America                                  | 0.97       | [0.10,9.32]  | 0.977   |
| Residency training |                                                |            |              |         |
|                    | Family Medicine                                | Base       |              |         |
|                    | Orthopedics                                    | 1.85       | [0.78,4.37]  | 0.163   |
|                    | Internal Medicine                              | 0.38       | [0.08,1.80]  | 0.224   |
|                    | PM&R                                           | 1.02       | [0.49,2.12]  | 0.952   |
|                    | Pediatrics                                     | 1.19       | [0.48,2.92]  | 0.712   |
|                    | Emergency Medicine                             | 1.62       | [0.57,4.64]  | 0.368   |
|                    | Sports Medicine                                | 0.96       | [0.25,3.61]  | 0.948   |
|                    | Other                                          | 3.41       | [0.65,17.75] | 0.146   |
|                    | Male athletic trainers                         | Odds Ratio | 95% CI       | p value |
| Age                |                                                | 1.01       | [0.98,1.03]  | 0.595   |
| Region             |                                                |            |              |         |
|                    | Europe                                         | Base       |              |         |
|                    | Africa                                         | 7.99       | [2.84,22.44] | < 0.001 |



|                                 |            |              |         |
|---------------------------------|------------|--------------|---------|
| Asia                            | 0.93       | [0.42,2.08]  | 0.865   |
| North America                   | 2.04       | [1.05,3.98]  | 0.036   |
| Oceania                         | 3.99       | [0.57,28.04] | 0.165   |
| South America                   | 0.40       | [0.04,3.70]  | 0.417   |
| Residency training              |            |              |         |
| Family Medicine                 | Base       |              |         |
| Orthopedics                     | 0.88       | [0.40,1.91]  | 0.745   |
| Internal Medicine               | 0.56       | [0.20,1.57]  | 0.271   |
| PM&R                            | 0.88       | [0.46,1.66]  | 0.684   |
| Pediatrics                      | 0.59       | [0.27,1.31]  | 0.195   |
| Emergency Medicine              | 0.68       | [0.26,1.77]  | 0.434   |
| Sports Medicine                 | 0.79       | [0.27,2.33]  | 0.672   |
| Other                           | 1.83       | [0.40,8.41]  | 0.435   |
| Female athletic trainers        | Odds Ratio | 95% CI       | p value |
| Age                             | 1.03       | [1.00,1.05]  | 0.049   |
| Region                          |            |              |         |
| Europe                          | Base       |              |         |
| Africa                          | 7.26       | [2.33,22.66] | 0.001   |
| Asia                            | 1.27       | [0.51,3.12]  | 0.610   |
| North America                   | 2.28       | [1.05,4.96]  | 0.037   |
| Oceania                         | n.c.       |              |         |
| South America                   | 0.69       | [0.07,6.64]  | 0.748   |
| Residency training              |            |              |         |
| Family Medicine                 | Base       |              |         |
| Orthopedics                     | 1.00       | [0.42,2.40]  | 0.995   |
| Internal Medicine               | 0.24       | [0.05,1.16]  | 0.076   |
| PM&R                            | 1.31       | [0.66,2.59]  | 0.442   |
| Pediatrics                      | 1.01       | [0.43,2.36]  | 0.981   |
| Emergency Medicine              | 1.42       | [0.52,3.88]  | 0.499   |
| Sports Medicine                 | 0.99       | [0.28,3.50]  | 0.984   |
| Other                           | 5.23       | [1.17,23.3]  | 0.030   |
| Organizations/Administrations   | Odds Ratio | 95% CI       | p value |
| Age                             | 1.02       | [0.99,1.04]  | 0.137   |
| Region                          |            |              |         |
| Europe                          | Base       |              |         |
| Africa                          | 2.40       | [0.83,6.97]  | 0.108   |
| Asia                            | 0.71       | [0.32,1.57]  | 0.397   |
| North America                   | 1.73       | [0.90,3.30]  | 0.099   |
| Oceania                         | 2.55       | [0.37,17.80] | 0.345   |
| South America                   | 3.62       | [0.55,23.95] | 0.182   |
| Residency training              |            |              |         |
| Family Medicine                 | Base       |              |         |
| Orthopedics                     | 1.03       | [0.48,2.21]  | 0.948   |
| Internal Medicine               | 0.32       | [0.11,0.98]  | 0.046   |
| PM&R                            | 0.45       | [0.23,0.88]  | 0.020   |
| Pediatrics                      | 0.65       | [0.32,1.34]  | 0.245   |
| Emergency Medicine              | 0.43       | [0.15,1.23]  | 0.117   |
| Sports Medicine                 | 0.97       | [0.35,2.71]  | 0.957   |
| Other                           | 1.10       | [0.25,4.78]  | 0.900   |
| Male sports medicine physicians |            |              |         |
| Male athletes                   | Odds Ratio | 95% CI       | p value |

|                    |            |             |         |
|--------------------|------------|-------------|---------|
| Age                | 0.98       | [0.97,0.99] | 0.006   |
| Region             |            |             |         |
| Europe             | Base       |             |         |
| Africa             | 1.08       | [0.38,3.12] | 0.884   |
| Asia               | 0.58       | [0.38,0.89] | 0.012   |
| North America      | 1.22       | [0.80,1.87] | 0.357   |
| Oceania            | 0.75       | [0.12,4.62] | 0.758   |
| South America      | 1.38       | [0.64,2.95] | 0.412   |
| Multiple           | 0.29       | [0.03,3.28] | 0.318   |
| Residency training |            |             |         |
| Family Medicine    | Base       |             |         |
| Orthopedics        | 0.69       | [0.43,1.12] | 0.131   |
| Internal Medicine  | 0.59       | [0.29,1.20] | 0.144   |
| PM&R               | 0.73       | [0.41,1.29] | 0.277   |
| Pediatrics         | 1.38       | [0.47,4.07] | 0.563   |
| Emergency Medicine | 0.27       | [0.10,0.73] | 0.010   |
| Sports Medicine    | 1.66       | [0.81,3.38] | 0.164   |
| Other              | 0.68       | [0.31,1.51] | 0.343   |
| Female athletes    | Odds Ratio | 95% CI      | p value |
| Age                | 0.99       | [0.97,1.00] | 0.030   |
| Region             |            |             |         |
| Europe             | Base       |             |         |
| Africa             | 1.95       | [0.70,5.41] | 0.200   |
| Asia               | 0.56       | [0.36,0.87] | 0.010   |
| North America      | 1.37       | [0.89,2.12] | 0.151   |
| Oceania            | 0.24       | [0.02,2.52] | 0.237   |
| South America      | 0.98       | [0.43,2.20] | 0.957   |
| Multiple           | 0.45       | [0.04,5.00] | 0.519   |
| Residency training |            |             |         |
| Family Medicine    | Base       |             |         |
| Orthopedics        | 0.55       | [0.33,0.90] | 0.016   |
| Internal Medicine  | 0.94       | [0.48,1.86] | 0.870   |
| PM&R               | 0.74       | [0.41,1.33] | 0.312   |
| Pediatrics         | 1.06       | [0.36,3.11] | 0.912   |
| Emergency Medicine | 0.23       | [0.08,0.68] | 0.008   |
| Sports Medicine    | 1.18       | [0.57,2.47] | 0.652   |
| Other              | 0.59       | [0.25,1.36] | 0.214   |
| Male coaches       | Odds Ratio | 95% CI      | p value |
| Age                | 0.99       | [0.98,1.00] | 0.160   |
| Region             |            |             |         |
| Europe             | Base       |             |         |
| Africa             | 1.76       | [0.63,4.96] | 0.283   |
| Asia               | 0.52       | [0.34,0.80] | 0.003   |
| North America      | 1.18       | [0.77,1.82] | 0.448   |
| Oceania            | 0.49       | [0.08,2.97] | 0.440   |
| South America      | 0.93       | [0.44,1.99] | 0.854   |
| Multiple           | 0.24       | [0.02,2.68] | 0.246   |
| Residency training |            |             |         |
| Family Medicine    | Base       |             |         |
| Orthopedics        | 0.75       | [0.46,1.21] | 0.235   |
| Internal Medicine  | 0.87       | [0.44,1.72] | 0.699   |

|                    |                                              |            |              |         |
|--------------------|----------------------------------------------|------------|--------------|---------|
|                    | PM&R                                         | 0.62       | [0.35,1.11]  | 0.108   |
|                    | Pediatrics                                   | 1.42       | [0.48,4.17]  | 0.524   |
|                    | Emergency Medicine                           | 0.20       | [0.07,0.59]  | 0.003   |
|                    | Sports Medicine                              | 2.39       | [1.15,4.95]  | 0.019   |
|                    | Other                                        | 0.76       | [0.34,1.69]  | 0.502   |
|                    | Female coaches                               | Odds Ratio | 95% CI       | p value |
| Age                |                                              | 1.00       | [0.99,1.02]  | 0.747   |
| Region             |                                              |            |              |         |
|                    | Europe                                       | Base       |              |         |
|                    | Africa                                       | 4.55       | [1.71,12.12] | 0.002   |
|                    | Asia                                         | 0.87       | [0.54,1.40]  | 0.573   |
|                    | North America                                | 1.59       | [1.00,2.51]  | 0.049   |
|                    | Oceania                                      | 0.26       | [0.03,2.68]  | 0.257   |
|                    | South America                                | 1.41       | [0.61,3.24]  | 0.421   |
|                    | Multiple                                     | 0.63       | [0.06,6.88]  | 0.702   |
| Residency training |                                              |            |              |         |
|                    | Family Medicine                              | Base       |              |         |
|                    | Orthopedics                                  | 0.51       | [0.30,0.85]  | 0.011   |
|                    | Internal Medicine                            | 0.85       | [0.42,1.71]  | 0.641   |
|                    | PM&R                                         | 0.66       | [0.35,1.21]  | 0.178   |
|                    | Pediatrics                                   | 0.88       | [0.29,2.67]  | 0.824   |
|                    | Emergency Medicine                           | 0.25       | [0.08,0.81]  | 0.021   |
|                    | Sports Medicine                              | 1.78       | [0.83,3.79]  | 0.136   |
|                    | Other                                        | 0.57       | [0.25,1.33]  | 0.195   |
|                    | Male physicians in practice longer           | Odds Ratio | 95% CI       | p value |
| Age                |                                              | 0.95       | [0.94,0.97]  | < 0.001 |
| Region             |                                              |            |              |         |
|                    | Europe                                       | Base       |              |         |
|                    | Africa                                       | 3.26       | [1.25,8.49]  | 0.016   |
|                    | Asia                                         | 0.94       | [0.60,1.46]  | 0.772   |
|                    | North America                                | 1.44       | [0.88,2.35]  | 0.145   |
|                    | Oceania                                      | 0.18       | [0.02,1.95]  | 0.160   |
|                    | South America                                | 1.83       | [0.87,3.88]  | 0.113   |
|                    | Multiple                                     | 0.35       | [0.03,4.14]  | 0.407   |
| Residency training |                                              |            |              |         |
|                    | Family Medicine                              | Base       |              |         |
|                    | Orthopedics                                  | 1.36       | [0.81,2.29]  | 0.248   |
|                    | Internal Medicine                            | 1.16       | [0.57,2.35]  | 0.690   |
|                    | PM&R                                         | 1.21       | [0.66,2.24]  | 0.534   |
|                    | Pediatrics                                   | 3.90       | [1.35,11.26] | 0.012   |
|                    | Emergency Medicine                           | 0.91       | [0.35,2.39]  | 0.854   |
|                    | Sports Medicine                              | 2.10       | [0.98,4.50]  | 0.056   |
|                    | Other                                        | 1.59       | [0.72,3.52]  | 0.251   |
|                    | Male physicians in practice the same or less | Odds Ratio | 95% CI       | p value |
| Age                |                                              | 0.99       | [0.98,1.01]  | 0.289   |
| Region             |                                              |            |              |         |
|                    | Europe                                       | Base       |              |         |
|                    | Africa                                       | 4.13       | [1.48,11.51] | 0.007   |
|                    | Asia                                         | 0.85       | [0.55,1.31]  | 0.459   |
|                    | North America                                | 1.18       | [0.74,1.87]  | 0.483   |
|                    | Oceania                                      | 0.45       | [0.04,4.70]  | 0.507   |

|                                                |                    |            |              |         |
|------------------------------------------------|--------------------|------------|--------------|---------|
|                                                | South America      | 0.86       | [0.38,1.94]  | 0.723   |
|                                                | Multiple           | 0.70       | [0.07,7.54]  | 0.770   |
| Residency training                             |                    |            |              |         |
|                                                | Family Medicine    | Base       |              |         |
|                                                | Orthopedics        | 1.32       | [0.79,2.20]  | 0.285   |
|                                                | Internal Medicine  | 0.84       | [0.40,1.79]  | 0.652   |
|                                                | PM&R               | 1.11       | [0.61,2.01]  | 0.740   |
|                                                | Pediatrics         | 1.57       | [0.51,4.80]  | 0.430   |
|                                                | Emergency Medicine | 1.45       | [0.55,3.80]  | 0.452   |
|                                                | Sports Medicine    | 1.28       | [0.59,2.78]  | 0.531   |
|                                                | Other              | 1.11       | [0.49,2.50]  | 0.810   |
| Female physicians in practice longer           |                    | Odds Ratio | 95% CI       | p value |
| Age                                            |                    | 0.95       | [0.94,0.97]  | < 0.001 |
| Region                                         |                    |            |              |         |
|                                                | Europe             | Base       |              |         |
|                                                | Africa             | 2.81       | [1.03,7.63]  | 0.043   |
|                                                | Asia               | 0.60       | [0.37,0.95]  | 0.031   |
|                                                | North America      | 1.11       | [0.69,1.79]  | 0.666   |
|                                                | Oceania            | 0.92       | [0.13,6.38]  | 0.929   |
|                                                | South America      | 0.49       | [0.19,1.23]  | 0.128   |
|                                                | Multiple           | 0.59       | [0.05,6.62]  | 0.665   |
| Residency training                             |                    |            |              |         |
|                                                | Family Medicine    | Base       |              |         |
|                                                | Orthopedics        | 1.02       | [0.60,1.75]  | 0.932   |
|                                                | Internal Medicine  | 0.99       | [0.46,2.12]  | 0.976   |
|                                                | PM&R               | 0.88       | [0.48,1.63]  | 0.687   |
|                                                | Pediatrics         | 1.94       | [0.63,5.96]  | 0.247   |
|                                                | Emergency Medicine | 0.68       | [0.24,1.91]  | 0.462   |
|                                                | Sports Medicine    | 1.38       | [0.62,3.05]  | 0.427   |
|                                                | Other              | 0.94       | [0.38,2.36]  | 0.902   |
| Female physicians in practice the same or less |                    | Odds Ratio | 95% CI       | p value |
| Age                                            |                    | 0.98       | [0.97,1.00]  | 0.017   |
| Region                                         |                    |            |              |         |
|                                                | Europe             | Base       |              |         |
|                                                | Africa             | 2.52       | [0.90,7.06]  | 0.078   |
|                                                | Asia               | 0.76       | [0.47,1.23]  | 0.259   |
|                                                | North America      | 1.11       | [0.67,1.82]  | 0.693   |
|                                                | Oceania            | n.c.       |              |         |
|                                                | South America      | 1.03       | [0.44,2.44]  | 0.944   |
|                                                | Multiple           | 1.04       | [0.10,11.06] | 0.974   |
| Residency training                             |                    |            |              |         |
|                                                | Family Medicine    | Base       |              |         |
|                                                | Orthopedics        | 1.15       | [0.66,2.01]  | 0.616   |
|                                                | Internal Medicine  | 1.15       | [0.52,2.55]  | 0.732   |
|                                                | PM&R               | 1.51       | [0.80,2.83]  | 0.202   |
|                                                | Pediatrics         | 2.99       | [1.02,8.80]  | 0.046   |
|                                                | Emergency Medicine | 2.21       | [0.85,5.75]  | 0.103   |
|                                                | Sports Medicine    | 1.34       | [0.59,3.05]  | 0.482   |
|                                                | Other              | 1.28       | [0.53,3.13]  | 0.582   |
| Male athletic trainers                         |                    | Odds Ratio | 95% CI       | p value |
| Age                                            |                    | 0.99       | [0.98,1.01]  | 0.219   |

|                               |            |             |         |
|-------------------------------|------------|-------------|---------|
| Region                        |            |             |         |
| Europe                        | Base       |             |         |
| Africa                        | 1.91       | [0.69,5.34] | 0.216   |
| Asia                          | 0.60       | [0.39,0.93] | 0.024   |
| North America                 | 0.78       | [0.49,1.24] | 0.995   |
| Oceania                       | 0.2        | [0.02,2.03] | 0.173   |
| South America                 | 1.09       | [0.49,2.44] | 0.827   |
| Multiple                      | n.c.       |             |         |
| Residency training            |            |             |         |
| Family Medicine               | Base       |             |         |
| Orthopedics                   | 0.80       | [0.47,1.34] | 0.390   |
| Internal Medicine             | 0.77       | [0.37,1.62] | 0.497   |
| PM&R                          | 0.99       | [0.54,1.81] | 0.971   |
| Pediatrics                    | 0.97       | [0.31,3.03] | 0.955   |
| Emergency Medicine            | 0.24       | [0.07,0.85] | 0.028   |
| Sports Medicine               | 2.01       | [0.94,4.30] | 0.071   |
| Other                         | 1.02       | [0.45,2.32] | 0.964   |
| Female athletic trainers      | Odds Ratio | 95% CI      | p value |
| Age                           | 0.99       | [0.98,1.01] | 0.504   |
| Region                        |            |             |         |
| Europe                        | Base       |             |         |
| Africa                        | 3.28       | [1.13,9.53] | 0.029   |
| Asia                          | 0.69       | [0.42,1.13] | 0.142   |
| North America                 | 1.12       | [0.68,1.85] | 0.649   |
| Oceania                       | 0.49       | [0.05,5.11] | 0.551   |
| South America                 | 2.16       | [0.98,4.77] | 0.056   |
| Multiple                      | n.c.       |             |         |
| Residency training            |            |             |         |
| Family Medicine               | Base       |             |         |
| Orthopedics                   | 0.72       | [0.41,1.25] | 0.239   |
| Internal Medicine             | 0.49       | [0.21,1.15] | 0.100   |
| PM&R                          | 0.81       | [0.42,1.54] | 0.513   |
| Pediatrics                    | 1.07       | [0.34,3.34] | 0.912   |
| Emergency Medicine            | 0.18       | [0.04,0.83] | 0.028   |
| Sports Medicine               | 1.28       | [0.57,2.89] | 0.550   |
| Other                         | 0.58       | [0.21,1.57] | 0.280   |
| Organizations/Administrations | Odds Ratio | 95% CI      | p value |
| Age                           | 0.99       | [0.98,1.00] | 0.122   |
| Region                        |            |             |         |
| Europe                        | Base       |             |         |
| Africa                        | 2.65       | [0.92,7.58] | 0.070   |
| Asia                          | 0.76       | [0.50,1.17] | 0.211   |
| North America                 | 0.74       | [0.47,1.16] | 0.186   |
| Oceania                       | 0.66       | [0.11,3.89] | 0.649   |
| South America                 | 1.86       | [0.88,3.92] | 0.105   |
| Multiple                      | 0.72       | [0.07,7.70] | 0.784   |
| Residency training            |            |             |         |
| Family Medicine               | Base       |             |         |
| Orthopedics                   | 0.74       | [0.45,1.21] | 0.233   |
| Internal Medicine             | 1.10       | [0.56,2.17] | 0.786   |
| PM&R                          | 0.81       | [0.44,1.48] | 0.489   |

|                    |      |             |       |
|--------------------|------|-------------|-------|
| Pediatrics         | 0.66 | [0.19,2.28] | 0.509 |
| Emergency Medicine | 0.51 | [0.18,1.45] | 0.207 |
| Sports Medicine    | 2.49 | [1.20,5.18] | 0.014 |
| Other              | 1.18 | [0.55,2.55] | 0.674 |

PM&R; physical medicine and rehabilitation, 95 % CI; 95 % confidence interval, n.c; not calculated

Table 3 Results of ordinal logistic regression on having sexually harassed (both genders combined)

| Male athletes             |                    | Odds Ratio | 95% CI        | p value |
|---------------------------|--------------------|------------|---------------|---------|
| <b>Gender</b>             |                    |            |               |         |
|                           | Male               | Base       |               |         |
|                           | Female             | 11.58      | [5.75,23.30]  | < 0.001 |
| <b>Age</b>                |                    |            |               |         |
|                           |                    | 0.96       | [0.94,0.99]   | 0.021   |
| <b>Region</b>             |                    |            |               |         |
|                           | Europe             | Base       |               |         |
|                           | Africa             | 7.43       | [2.4,22.98]   | < 0.001 |
|                           | Asia               | 2.8        | [1.03,7.62]   | 0.044   |
|                           | North America      | 1.39       | [0.58,3.34]   | 0.457   |
|                           | Oceania            | 67.5       | [4.66,978.04] | 0.002   |
|                           | South America      | 7.92       | [1.34,46.89]  | 0.023   |
|                           | Multiple           | n.c.       |               |         |
| <b>Residency training</b> |                    |            |               |         |
|                           | Family Medicine    | Base       |               |         |
|                           | Orthopedics        | 0.43       | [0.16,1.17]   | 0.097   |
|                           | Internal Medicine  | 0.34       | [0.07,1.56]   | 0.165   |
|                           | PM&R               | 0.65       | [0.29,1.45]   | 0.292   |
|                           | Pediatrics         | 0.23       | [0.05,1.06]   | 0.059   |
|                           | Emergency Medicine | 0.42       | [0.09,1.88]   | 0.254   |
|                           | Sports Medicine    | 0.13       | [0.01,1.20]   | 0.072   |
|                           | Other              | 1.51       | [0.35,6.62]   | 0.582   |
| <b>Female athletes</b>    |                    |            |               |         |
|                           |                    | Odds Ratio | 95% CI        | p value |
| <b>Gender</b>             |                    |            |               |         |
|                           | Male               | Base       |               |         |
|                           | Female             | 0.37       | [0.16,0.89]   | 0.026   |
| <b>Age</b>                |                    |            |               |         |
|                           |                    | 0.97       | [0.93,1.00]   | 0.050   |
| <b>Region</b>             |                    |            |               |         |
|                           | Europe             | Base       |               |         |
|                           | Africa             | 4.57       | [1.42,14.78]  | 0.011   |
|                           | Asia               | 0.77       | [0.28,2.07]   | 0.598   |
|                           | North America      | 0.42       | [0.14,1.23]   | 0.112   |
|                           | Oceania            | 69.31      | [5.45,880.55] | 0.001   |
|                           | South America      | 4.71       | [1.26,17.67]  | 0.022   |
|                           | Multiple           | n.c.       |               |         |
| <b>Residency training</b> |                    |            |               |         |
|                           | Family Medicine    | Base       |               |         |
|                           | Orthopedics        | 0.90       | [0.27,2.99]   | 0.870   |
|                           | Internal Medicine  | 0.87       | [0.16,4.71]   | 0.867   |
|                           | PM&R               | 2.69       | [0.96,7.53]   | 0.060   |
|                           | Pediatrics         | n.c.       |               |         |
|                           | Emergency Medicine | 0.80       | [0.09,7.34]   | 0.847   |
|                           | Sports Medicine    | 0.26       | [0.03,2.48]   | 0.244   |
|                           | Other              | 1.84       | [0.32,10.44]  | 0.491   |
| <b>Male coaches</b>       |                    |            |               |         |
|                           |                    | Odds Ratio | 95% CI        | p value |
| <b>Gender</b>             |                    |            |               |         |
|                           | Male               | Base       |               |         |
|                           | Female             | 9.41       | [4.35,20.36]  | < 0.001 |

|                                    |            |               |         |
|------------------------------------|------------|---------------|---------|
| Age                                | 0.97       | [0.94,1.01]   | 0.101   |
| Region                             |            |               |         |
| Europe                             | Base       |               |         |
| Africa                             | 7.87       | [2.36,26.27]  | 0.001   |
| Asia                               | 2.80       | [0.86,9.14]   | 0.088   |
| North America                      | 1.17       | [0.44,3.14]   | 0.751   |
| Oceania                            | 30.67      | [3.30,285.07] | 0.003   |
| South America                      | 6.34       | [1.05,38.13]  | 0.044   |
| Multiple                           | n.c.       |               |         |
| Residency training                 |            |               |         |
| Family Medicine                    | Base       |               |         |
| Orthopedics                        | 0.30       | [0.09,1.00]   | 0.049   |
| Internal Medicine                  | 0.43       | [0.09,2.06]   | 0.294   |
| PM&R                               | 0.52       | [0.2,1.34]    | 0.176   |
| Pediatrics                         | 0.73       | [0.23,2.32]   | 0.589   |
| Emergency Medicine                 | n.c.       |               |         |
| Sports Medicine                    | 0.35       | [0.06,1.95]   | 0.232   |
| Other                              | 1.05       | [0.19,5.89]   | 0.952   |
| Female coaches                     | Odds Ratio | 95% CI        | p value |
| Gender                             |            |               |         |
| Male                               | Base       |               |         |
| Female                             | 0.32       | [0.09,1.18]   | 0.086   |
| Age                                | 0.95       | [0.90,0.99]   | 0.030   |
| Region                             |            |               |         |
| Europe                             | Base       |               |         |
| Africa                             | 4.33       | [0.78,24.09]  | 0.094   |
| Asia                               | 1.37       | [0.37,5.07]   | 0.635   |
| North America                      | 0.74       | [0.16,3.51]   | 0.707   |
| Oceania                            | n.c.       |               |         |
| South America                      | 2.77       | [0.27,28.56]  | 0.392   |
| Multiple                           | n.c.       |               |         |
| Residency training                 |            |               |         |
| Family Medicine                    | Base       |               |         |
| Orthopedics                        | 2.13       | [0.37,12.34]  | 0.399   |
| Internal Medicine                  | n.c.       |               |         |
| PM&R                               | 3.79       | [0.81,17.66]  | 0.089   |
| Pediatrics                         | n.c.       |               |         |
| Emergency Medicine                 | 2.38       | [0.22,25.71]  | 0.476   |
| Sports Medicine                    | n.c.       |               |         |
| Other                              | 6.01       | [0.71,50.84]  | 0.099   |
| Male physicians in practice longer | Odds Ratio | 95% CI        | p value |
| Gender                             |            |               |         |
| Male                               | Base       |               |         |
| Female                             | 28.25      | [14.61,54.62] | < 0.001 |
| Age                                | 0.99       | [0.96,1.01]   | 0.272   |
| Region                             |            |               |         |
| Europe                             | Base       |               |         |
| Africa                             | 2.21       | [0.71,6.81]   | 0.169   |
| Asia                               | 1.37       | [0.63,2.97]   | 0.427   |
| North America                      | 1.83       | [0.90,3.73]   | 0.095   |
| Oceania                            | n.c.       |               |         |



|                                              |            |              |         |
|----------------------------------------------|------------|--------------|---------|
| South America                                | 3.46       | [0.81,14.78] | 0.093   |
| Multiple                                     | n.c.       |              |         |
| Residency training                           |            |              |         |
| Family Medicine                              | Base       |              |         |
| Orthopedics                                  | 2.00       | [0.92,4.35]  | 0.082   |
| Internal Medicine                            | 0.42       | [0.12,1.51]  | 0.184   |
| PM&R                                         | 0.63       | [0.30,1.29]  | 0.205   |
| Pediatrics                                   | 0.13       | [0.03,0.58]  | 0.007   |
| Emergency Medicine                           | 0.46       | [0.13,1.66]  | 0.236   |
| Sports Medicine                              | 0.73       | [0.22,2.40]  | 0.609   |
| Other                                        | 2.96       | [0.83,10.54] | 0.094   |
| Male physicians in practice the same or less | Odds Ratio | 95% CI       | p value |
| Gender                                       |            |              |         |
| Male                                         | Base       |              |         |
| Female                                       | 13.84      | [6.54,29.32] | < 0.001 |
| Age                                          | 0.99       | [0.96,1.02]  | 0.442   |
| Region                                       |            |              |         |
| Europe                                       | Base       |              |         |
| Africa                                       | 0.50       | [0.06,4.24]  | 0.528   |
| Asia                                         | 1.33       | [0.53,3.31]  | 0.542   |
| North America                                | 1.51       | [0.63,3.59]  | 0.354   |
| Oceania                                      | n.c.       |              |         |
| South America                                | 5.26       | [1.22,22.63] | 0.026   |
| Multiple                                     | n.c.       |              |         |
| Residency training                           |            |              |         |
| Family Medicine                              | Base       |              |         |
| Orthopedics                                  | 1.61       | [0.62,4.16]  | 0.328   |
| Internal Medicine                            | 0.65       | [0.14,3.04]  | 0.586   |
| PM&R                                         | 0.92       | [0.38,2.24]  | 0.852   |
| Pediatrics                                   | 0.36       | [0.08,1.59]  | 0.177   |
| Emergency Medicine                           | 0.74       | [0.16,3.43]  | 0.704   |
| Sports Medicine                              | 0.83       | [0.19,3.63]  | 0.802   |
| Other                                        | 2.77       | [0.62,12.41] | 0.183   |
| Female physicians in practice longer         | Odds Ratio | 95% CI       | p value |
| Gender                                       |            |              |         |
| Male                                         | Base       |              |         |
| Female                                       | 1.03       | [0.35,2.99]  | 0.960   |
| Age                                          | 0.99       | [0.95,1.03]  | 0.621   |
| Region                                       |            |              |         |
| Europe                                       | Base       |              |         |
| Africa                                       | 5.42       | [0.84,35.11] | 0.076   |
| Asia                                         | 1.18       | [0.32,4.36]  | 0.806   |
| North America                                | 1.07       | [0.22,5.22]  | 0.930   |
| Oceania                                      | n.c.       |              |         |
| South America                                | 4.33       | [0.70,26.62] | 0.114   |
| Multiple                                     | n.c.       |              |         |
| Residency training                           |            |              |         |
| Family Medicine                              | Base       |              |         |
| Orthopedics                                  | 1.90       | [0.38,9.47]  | 0.432   |
| Internal Medicine                            | n.c.       |              |         |

|                    |                                                |            |              |         |
|--------------------|------------------------------------------------|------------|--------------|---------|
|                    | PM&R                                           | 1.34       | [0.27,6.58]  | 0.716   |
|                    | Pediatrics                                     | n.c.       |              |         |
|                    | Emergency Medicine                             | n.c.       |              |         |
|                    | Sports Medicine                                | 0.84       | [0.07,9.81]  | 0.890   |
|                    | Other                                          | 3.98       | [0.53,29.9]  | 0.179   |
|                    | Female physicians in practice the same or less | Odds Ratio | 95% CI       | p value |
| Gender             |                                                |            |              |         |
|                    | Male                                           | Base       |              |         |
|                    | Female                                         | 0.61       | [0.20,1.83]  | 0.375   |
| Age                |                                                | 0.98       | [0.94,1.02]  | 0.316   |
| Region             |                                                |            |              |         |
|                    | Europe                                         | Base       |              |         |
|                    | Africa                                         | 6.84       | [1.28,36.62] | 0.025   |
|                    | Asia                                           | 1.71       | [0.50,5.85]  | 0.390   |
|                    | North America                                  | 0.64       | [0.13,3.09]  | 0.577   |
|                    | Oceania                                        | n.c.       |              |         |
|                    | South America                                  | 4.33       | [0.70,26.66] | 0.114   |
|                    | Multiple                                       | n.c.       |              |         |
| Residency training |                                                |            |              |         |
|                    | Family Medicine                                | Base       |              |         |
|                    | Orthopedics                                    | 1.73       | [0.37,8.16]  | 0.489   |
|                    | Internal Medicine                              | 0.82       | [0.08,8.45]  | 0.865   |
|                    | PM&R                                           | 1.63       | [0.35,7.61]  | 0.535   |
|                    | Pediatrics                                     | 2.10       | [0.22,20.43] | 0.523   |
|                    | Emergency Medicine                             | n.c.       |              |         |
|                    | Sports Medicine                                | n.c.       |              |         |
|                    | Other                                          | 2.99       | [0.40,22.31] | 0.285   |
|                    | Male athletic trainers                         | Odds Ratio | 95% CI       | p value |
| Gender             |                                                |            |              |         |
|                    | Male                                           | Base       |              |         |
|                    | Female                                         | 5.37       | [2.44,11.82] | < 0.001 |
| Age                |                                                | 0.99       | [0.96,1.03]  | 0.694   |
| Region             |                                                |            |              |         |
|                    | Europe                                         | Base       |              |         |
|                    | Africa                                         | 1.83       | [0.43,7.72]  | 0.410   |
|                    | Asia                                           | 1.71       | [0.59,4.96]  | 0.322   |
|                    | North America                                  | 0.49       | [0.18,1.33]  | 0.161   |
|                    | Oceania                                        | n.c.       |              |         |
|                    | South America                                  | 3.44       | [0.63,18.81] | 0.153   |
|                    | Multiple                                       | n.c.       |              |         |
| Residency training |                                                |            |              |         |
|                    | Family Medicine                                | Base       |              |         |
|                    | Orthopedics                                    | 0.45       | [0.14,1.43]  | 0.174   |
|                    | Internal Medicine                              | n.c.       |              |         |
|                    | PM&R                                           | 0.70       | [0.24,2.08]  | 0.525   |
|                    | Pediatrics                                     | 0.78       | [0.16,3.74]  | 0.760   |
|                    | Emergency Medicine                             | 0.48       | [0.06,3.88]  | 0.492   |
|                    | Sports Medicine                                | 0.38       | [0.07,2.08]  | 0.267   |
|                    | Other                                          | 0.90       | [0.16,4.99]  | 0.909   |
|                    | Female athletic trainers                       | Odds Ratio | 95% CI       | p value |

|                               |            |               |         |
|-------------------------------|------------|---------------|---------|
| Gender                        |            |               |         |
| Male                          | Base       |               |         |
| Female                        | 0.30       | [0.08,1.12]   | 0.073   |
| Age                           | 0.95       | [0.91,1.00]   | 0.053   |
| Region                        |            |               |         |
| Europe                        | Base       |               |         |
| Africa                        | 3.49       | [0.51,23.86]  | 0.202   |
| Asia                          | 3.10       | [0.68,14.06]  | 0.143   |
| North America                 | 0.54       | [0.11,2.73]   | 0.458   |
| Oceania                       | n.c.       |               |         |
| South America                 | 3.87       | [0.34,43.67]  | 0.274   |
| Multiple                      | n.c.       |               |         |
| Residency training            |            |               |         |
| Family Medicine               | Base       |               |         |
| Orthopedics                   | 0.44       | [0.08,2.48]   | 0.351   |
| Internal Medicine             | 1.46       | [0.21,9.97]   | 0.700   |
| PM&R                          | 1.01       | [0.19,5.48]   | 0.993   |
| Pediatrics                    | 2.56       | [0.26,25.17]  | 0.420   |
| Emergency Medicine            | 1.67       | [0.17,16.85]  | 0.662   |
| Sports Medicine               | n.c.       |               |         |
| Other                         | 1.91       | [0.24,15.34]  | 0.543   |
| Organizations/Administrations | Odds Ratio | 95% CI        | p value |
| Gender                        |            |               |         |
| Male                          | Base       |               |         |
| Female                        | 6.80       | [3.24,14.23]  | < 0.001 |
| Age                           | 1.01       | [0.98,1.04]   | 0.546   |
| Region                        |            |               |         |
| Europe                        | Base       |               |         |
| Africa                        | 10.18      | [2.95,35.19]  | < 0.001 |
| Asia                          | 3.35       | [0.99,11.37]  | 0.052   |
| North America                 | 1.48       | [0.52,4.26]   | 0.465   |
| Oceania                       | 19.87      | [2.71,145.48] | 0.003   |
| South America                 | 5.51       | [0.95,32.01]  | 0.058   |
| Multiple                      | n.c.       |               |         |
| Residency training            |            |               |         |
| Family Medicine               | Base       |               |         |
| Orthopedics                   | 0.26       | [0.08,0.86]   | 0.028   |
| Internal Medicine             | n.c.       |               |         |
| PM&R                          | 0.63       | [0.24,1.65]   | 0.342   |
| Pediatrics                    | 0.84       | [0.27,2.67]   | 0.769   |
| Emergency Medicine            | 0.33       | [0.04,2.56]   | 0.286   |
| Sports Medicine               | 0.66       | [0.15,2.95]   | 0.586   |
| Other                         | 0.83       | [0.15,4.66]   | 0.828   |

PM&R; physical medicine and rehabilitation, 95 % CI; 95 % confidence interval, n.c; not calculated

Table 4 Results of ordinal logistic regression on having sexually harassed (both genders separately)

| Female sports medicine physicians |            |               |         |
|-----------------------------------|------------|---------------|---------|
| Male athletes                     | Odds Ratio | 95% CI        | p value |
| Age                               | 0.98       | [0.95,1.02]   | 0.258   |
| Region                            |            |               |         |
| Europe                            | Base       |               |         |
| Africa                            | 7.79       | [2.23,27.21]  | 0.001   |
| Asia                              | 1.17       | [0.34,4.02]   | 0.799   |
| North America                     | 1.48       | [0.57,3.82]   | 0.424   |
| Oceania                           | 96.64      | [5.4,1730.32] | 0.002   |
| South America                     | 4.68       | [0.41,53.33]  | 0.214   |
| Residency training                |            |               |         |
| Family Medicine                   | Base       |               |         |
| Orthopedics                       | 0.68       | [0.22,2.11]   | 0.504   |
| Internal Medicine                 | 0.47       | [0.10,2.26]   | 0.343   |
| PM&R                              | 0.52       | [0.21,1.3]    | 0.160   |
| Pediatrics                        | 0.24       | [0.05,1.08]   | 0.063   |
| Emergency Medicine                | 0.51       | [0.11,2.35]   | 0.388   |
| Sports Medicine                   | 0.17       | [0.02,1.57]   | 0.117   |
| Other                             | 1.98       | [0.31,12.54]  | 0.469   |
| Female athletes                   | Odds Ratio | 95% CI        | p value |
| Age                               | 1.07       | [0.96,1.19]   | 0.216   |
| Region                            |            |               |         |
| Europe                            | Base       |               |         |
| Africa                            | 10.5       | [0.51,215.79] | 0.127   |
| Asia                              | 0.57       | [0.05,7.11]   | 0.660   |
| North America                     | 0.86       | [0.05,14.35]  | 0.914   |
| Oceania                           | n.c.       |               |         |
| South America                     | n.c.       |               |         |
| Residency training                |            |               |         |
| Family Medicine                   | Base       |               |         |
| Orthopedics                       | n.c.       |               |         |
| Internal Medicine                 | n.c.       |               |         |
| PM&R                              | n.c.       |               |         |
| Pediatrics                        | n.c.       |               |         |
| Emergency Medicine                | n.c.       |               |         |
| Sports Medicine                   | n.c.       |               |         |
| Other                             | n.c.       |               |         |
| Male coaches                      | Odds Ratio | 95% CI        | p value |
| Age                               | 1.00       | [0.96,1.04]   | 0.994   |
| Region                            |            |               |         |
| Europe                            | Base       |               |         |
| Africa                            | 6.91       | [1.84,25.94]  | 0.004   |
| Asia                              | 0.72       | [0.13,4.03]   | 0.708   |
| North America                     | 1.17       | [0.40,3.40]   | 0.769   |
| Oceania                           | 54.56      | [4.24,702.61] | 0.002   |
| South America                     | 3.23       | [0.30,35.26]  | 0.337   |
| Residency training                |            |               |         |
| Family Medicine                   | Base       |               |         |

|                                              |            |              |         |
|----------------------------------------------|------------|--------------|---------|
| Orthopedics                                  | 0.37       | [0.09,1.58]  | 0.178   |
| Internal Medicine                            | 0.63       | [0.13,3.18]  | 0.577   |
| PM&R                                         | 0.43       | [0.14,1.31]  | 0.139   |
| Pediatrics                                   | 0.73       | [0.23,2.35]  | 0.604   |
| Emergency Medicine                           | n.c.       |              |         |
| Sports Medicine                              | 0.40       | [0.07,2.36]  | 0.314   |
| Other                                        | 1.10       | [0.11,11.31] | 0.938   |
| Female coaches                               | Odds Ratio | 95% CI       | p value |
| Age                                          | 1.06       | [0.94,1.20]  | 0.355   |
| Region                                       |            |              |         |
| Europe                                       | Base       |              |         |
| Africa                                       | n.c.       |              |         |
| Asia                                         | 1.15       | [0.06,22.31] | 0.925   |
| North America                                | 2.10       | [0.06,70.52] | 0.678   |
| Oceania                                      | n.c.       |              |         |
| South America                                | n.c.       |              |         |
| Residency training                           |            |              |         |
| Family Medicine                              | Base       |              |         |
| Orthopedics                                  | n.c.       |              |         |
| Internal Medicine                            | n.c.       |              |         |
| PM&R                                         | n.c.       |              |         |
| Pediatrics                                   | n.c.       |              |         |
| Emergency Medicine                           | n.c.       |              |         |
| Sports Medicine                              | n.c.       |              |         |
| Other                                        | n.c.       |              |         |
| Male physicians in practice longer           | Odds Ratio | 95% CI       | p value |
| Age                                          | 1.00       | [0.98,1.03]  | 0.868   |
| Region                                       |            |              |         |
| Europe                                       | Base       |              |         |
| Africa                                       | 1.65       | [0.48,5.69]  | 0.425   |
| Asia                                         | 0.66       | [0.25,1.73]  | 0.395   |
| North America                                | 2.00       | [0.92,4.38]  | 0.082   |
| Oceania                                      | n.c.       |              |         |
| South America                                | 4.29       | [0.50,36.7]  | 0.184   |
| Residency training                           |            |              |         |
| Family Medicine                              | Base       |              |         |
| Orthopedics                                  | 3.27       | [1.35,7.93]  | 0.009   |
| Internal Medicine                            | 0.49       | [0.13,1.83]  | 0.291   |
| PM&R                                         | 0.47       | [0.20,1.06]  | 0.069   |
| Pediatrics                                   | 0.12       | [0.03,0.55]  | 0.006   |
| Emergency Medicine                           | 0.49       | [0.13,1.82]  | 0.288   |
| Sports Medicine                              | 0.76       | [0.22,2.65]  | 0.668   |
| Other                                        | 2.46       | [0.49,12.38] | 0.274   |
| Male physicians in practice the same or less | Odds Ratio | 95% CI       | p value |
| Age                                          | 1.00       | [0.97,1.04]  | 0.960   |
| Region                                       |            |              |         |
| Europe                                       | Base       |              |         |
| Africa                                       | n.c.       |              |         |
| Asia                                         | 0.66       | [0.20,2.16]  | 0.490   |
| North America                                | 1.94       | [0.72,5.19]  | 0.187   |
| Oceania                                      | n.c.       |              |         |

|                    |                                                |            |               |         |
|--------------------|------------------------------------------------|------------|---------------|---------|
|                    | South America                                  | 2.48       | [0.21,28.86]  | 0.468   |
| Residency training |                                                |            |               |         |
|                    | Family Medicine                                | Base       |               |         |
|                    | Orthopedics                                    | 2.77       | [0.93,8.24]   | 0.067   |
|                    | Internal Medicine                              | 0.93       | [0.19,4.53]   | 0.930   |
|                    | PM&R                                           | 0.91       | [0.34,2.45]   | 0.847   |
|                    | Pediatrics                                     | 0.18       | [0.02,1.38]   | 0.098   |
|                    | Emergency Medicine                             | 0.86       | [0.18,4.06]   | 0.846   |
|                    | Sports Medicine                                | 1.29       | [0.27,6.27]   | 0.751   |
|                    | Other                                          | 3.83       | [0.58,25.28]  | 0.163   |
|                    | Female physicians in practice longer           | Odds Ratio | 95% CI        | p value |
| Age                |                                                | 1.12       | [1.02,1.22]   | 0.017   |
| Region             |                                                |            |               |         |
|                    | Europe                                         | Base       |               |         |
|                    | Africa                                         | n.c.       |               |         |
|                    | Asia                                           | 3.04       | [0.21,43.03]  | 0.411   |
|                    | North America                                  | 1.26       | [0.06,26.77]  | 0.883   |
|                    | Oceania                                        | n.c.       |               |         |
|                    | South America                                  | n.c.       |               |         |
| Residency training |                                                |            |               |         |
|                    | Family Medicine                                | Base       |               |         |
|                    | Orthopedics                                    | 1.50       | [0.08,29.57]  | 0.792   |
|                    | Internal Medicine                              | n.c.       |               |         |
|                    | PM&R                                           | n.c.       |               |         |
|                    | Pediatrics                                     | n.c.       |               |         |
|                    | Emergency Medicine                             | n.c.       |               |         |
|                    | Sports Medicine                                | 1.72       | [0.04,74.98]  | 0.779   |
|                    | Other                                          | 5.66       | [0.13,244.09] | 0.366   |
|                    | Female physicians in practice the same or less | Odds Ratio | 95% CI        | p value |
| Age                |                                                | 1.10       | [0.99,1.21]   | 0.064   |
| Region             |                                                |            |               |         |
|                    | Europe                                         | Base       |               |         |
|                    | Africa                                         | n.c.       |               |         |
|                    | Asia                                           | 3.01       | [0.22,40.79]  | 0.408   |
|                    | North America                                  | 1.29       | [0.06,29.87]  | 0.873   |
|                    | Oceania                                        | n.c.       |               |         |
|                    | South America                                  | n.c.       |               |         |
| Residency training |                                                |            |               |         |
|                    | Family Medicine                                | Base       |               |         |
|                    | Orthopedics                                    | 1.68       | [0.08,35.90]  | 0.739   |
|                    | Internal Medicine                              | n.c.       |               |         |
|                    | PM&R                                           | n.c.       |               |         |
|                    | Pediatrics                                     | n.c.       |               |         |
|                    | Emergency Medicine                             | n.c.       |               |         |
|                    | Sports Medicine                                | n.c.       |               |         |
|                    | Other                                          | 6.11       | [0.14,275.62] | 0.352   |
|                    | Male athletic trainers                         | Odds Ratio | 95% CI        | p value |
| Age                |                                                | 1.04       | [0.99,1.08]   | 0.099   |
| Region             |                                                |            |               |         |
|                    | Europe                                         | Base       |               |         |
|                    | Africa                                         | 1.38       | [0.24,8.00]   | 0.716   |

|                                 |            |               |         |
|---------------------------------|------------|---------------|---------|
| Asia                            | 0.77       | [0.17,3.47]   | 0.737   |
| North America                   | 0.65       | [0.19,2.16]   | 0.480   |
| Oceania                         | n.c.       |               |         |
| South America                   | n.c.       |               |         |
| Residency training              |            |               |         |
| Family Medicine                 | Base       |               |         |
| Orthopedics                     | 0.88       | [0.22,3.47]   | 0.856   |
| Internal Medicine               | n.c.       |               |         |
| PM&R                            | 0.36       | [0.07,1.82]   | 0.217   |
| Pediatrics                      | 0.43       | [0.05,3.47]   | 0.431   |
| Emergency Medicine              | 0.59       | [0.07,4.94]   | 0.625   |
| Sports Medicine                 | 0.54       | [0.09,3.38]   | 0.508   |
| Other                           | 1.18       | [0.11,12.91]  | 0.891   |
| Female athletic trainers        | Odds Ratio | 95% CI        | p value |
| Age                             | 1.06       | [0.93,1.20]   | 0.366   |
| Region                          |            |               |         |
| Europe                          | Base       |               |         |
| Africa                          | n.c.       |               |         |
| Asia                            | 1.19       | [0.06,23.07]  | 0.909   |
| North America                   | 2.15       | [0.06,72.86]  | 0.670   |
| Oceania                         | n.c.       |               |         |
| South America                   | n.c.       |               |         |
| Residency training              |            |               |         |
| Family Medicine                 | Base       |               |         |
| Orthopedics                     | n.c.       |               |         |
| Internal Medicine               | n.c.       |               |         |
| PM&R                            | n.c.       |               |         |
| Pediatrics                      | n.c.       |               |         |
| Emergency Medicine              | n.c.       |               |         |
| Sports Medicine                 | n.c.       |               |         |
| Other                           | n.c.       |               |         |
| Organizations/Administrations   | Odds Ratio | 95% CI        | p value |
| Age                             | 1.06       | [1.02,1.10]   | 0.004   |
| Region                          |            |               |         |
| Europe                          | Base       |               |         |
| Africa                          | 8.49       | [1.73,41.69]  | 0.008   |
| Asia                            | 2.10       | [0.38,11.70]  | 0.396   |
| North America                   | 2.49       | [0.64,9.59]   | 0.186   |
| Oceania                         | 47.58      | [4.69,483.01] | 0.001   |
| South America                   | 5.78       | [0.51,66.11]  | 0.158   |
| Residency training              |            |               |         |
| Family Medicine                 | Base       |               |         |
| Orthopedics                     | 0.34       | [0.07,1.59]   | 0.170   |
| Internal Medicine               | n.c.       |               |         |
| PM&R                            | 0.30       | [0.08,1.22]   | 0.094   |
| Pediatrics                      | 0.60       | [0.16,2.20]   | 0.439   |
| Emergency Medicine              | 0.39       | [0.05,3.13]   | 0.374   |
| Sports Medicine                 | 0.93       | [0.16,5.33]   | 0.937   |
| Other                           | 1.42       | [0.12,17.36]  | 0.784   |
| Male sports medicine physicians |            |               |         |
| Male athletes                   | Odds Ratio | 95% CI        | p value |

|                    |                    |            |              |         |
|--------------------|--------------------|------------|--------------|---------|
| Age                |                    | 0.92       | [0.85,0.99]  | 0.022   |
| Region             |                    |            |              |         |
|                    | Europe             | Base       |              |         |
|                    | Africa             | n.c.       |              |         |
|                    | Asia               | n.c.       |              |         |
|                    | North America      | n.c.       |              |         |
|                    | Oceania            | n.c.       |              |         |
|                    | South America      | n.c.       |              |         |
|                    | Multiple           | n.c.       |              |         |
| Residency training |                    |            |              |         |
|                    | Family Medicine    | Base       |              |         |
|                    | Orthopedics        | 0.04       | [0.00,0.40]  | 0.007   |
|                    | Internal Medicine  | n.c.       |              |         |
|                    | PM&R               | 0.41       | [0.04,4.11]  | 0.451   |
|                    | Pediatrics         | n.c.       |              |         |
|                    | Emergency Medicine | n.c.       |              |         |
|                    | Sports Medicine    | n.c.       |              |         |
|                    | Other              | 0.23       | [0.01,4.34]  | 0.328   |
|                    | Female athletes    | Odds Ratio | 95% CI       | p value |
| Age                |                    | 0.97       | [0.93,1.00]  | 0.063   |
| Region             |                    |            |              |         |
|                    | Europe             | Base       |              |         |
|                    | Africa             | 6.12       | [1.53,24.39] | 0.010   |
|                    | Asia               | 0.97       | [0.32,2.97]  | 0.953   |
|                    | North America      | 0.45       | [0.14,1.45]  | 0.181   |
|                    | Oceania            | n.c.       |              |         |
|                    | South America      | 5.96       | [1.45,24.45] | 0.013   |
|                    | Multiple           | n.c.       |              |         |
| Residency training |                    |            |              |         |
|                    | Family Medicine    | Base       |              |         |
|                    | Orthopedics        | 0.53       | [0.14,1.94]  | 0.334   |
|                    | Internal Medicine  | 0.66       | [0.11,3.88]  | 0.643   |
|                    | PM&R               | 2.30       | [0.76,6.96]  | 0.140   |
|                    | Pediatrics         | n.c.       |              |         |
|                    | Emergency Medicine | n.c.       |              |         |
|                    | Sports Medicine    | 0.21       | [0.02,2.10]  | 0.185   |
|                    | Other              | 0.68       | [0.07,6.64]  | 0.744   |
|                    | Male coaches       | Odds Ratio | 95% CI       | p value |
| Age                |                    | 0.88       | [0.81,0.97]  | 0.007   |
| Region             |                    |            |              |         |
|                    | Europe             | Base       |              |         |
|                    | Africa             | n.c.       |              |         |
|                    | Asia               | n.c.       |              |         |
|                    | North America      | n.c.       |              |         |
|                    | Oceania            | n.c.       |              |         |
|                    | South America      | n.c.       |              |         |
|                    | Multiple           | n.c.       |              |         |
| Residency training |                    |            |              |         |
|                    | Family Medicine    | Base       |              |         |
|                    | Orthopedics        | 0.04       | [0.00,0.67]  | 0.025   |
|                    | Internal Medicine  | n.c.       |              |         |



|                    |                                              |            |              |         |
|--------------------|----------------------------------------------|------------|--------------|---------|
|                    | PM&R                                         | 0.22       | [0.01,3.76]  | 0.296   |
|                    | Pediatrics                                   | n.c.       |              |         |
|                    | Emergency Medicine                           | n.c.       |              |         |
|                    | Sports Medicine                              | n.c.       |              |         |
|                    | Other                                        | 0.35       | [0.01,9.46]  | 0.532   |
|                    | Female coaches                               | Odds Ratio | 95% CI       | p value |
| Age                |                                              | 0.94       | [0.89,0.99]  | 0.022   |
| Region             |                                              |            |              |         |
|                    | Europe                                       | Base       |              |         |
|                    | Africa                                       | 6.24       | [0.93,41.75] | 0.059   |
|                    | Asia                                         | 1.63       | [0.36,7.32]  | 0.526   |
|                    | North America                                | 0.74       | [0.13,4.26]  | 0.733   |
|                    | Oceania                                      | n.c.       |              |         |
|                    | South America                                | 3.45       | [0.3,39.58]  | 0.319   |
|                    | Multiple                                     | n.c.       |              |         |
| Residency training |                                              |            |              |         |
|                    | Family Medicine                              | Base       |              |         |
|                    | Orthopedics                                  | 1.45       | [0.22,9.70]  | 0.702   |
|                    | Internal Medicine                            | n.c.       |              |         |
|                    | PM&R                                         | 3.20       | [0.64,16.03] | 0.157   |
|                    | Pediatrics                                   | n.c.       |              |         |
|                    | Emergency Medicine                           | n.c.       |              |         |
|                    | Sports Medicine                              | n.c.       |              |         |
|                    | Other                                        | 2.54       | [0.18,36.01] | 0.490   |
|                    | Male physicians in practice longer           | Odds Ratio | 95% CI       | p value |
| Age                |                                              | 0.93       | [0.88,0.99]  | 0.025   |
| Region             |                                              |            |              |         |
|                    | Europe                                       | Base       |              |         |
|                    | Africa                                       | n.c.       |              |         |
|                    | Asia                                         | n.c.       |              |         |
|                    | North America                                | n.c.       |              |         |
|                    | Oceania                                      | n.c.       |              |         |
|                    | South America                                | n.c.       |              |         |
|                    | Multiple                                     | n.c.       |              |         |
| Residency training |                                              |            |              |         |
|                    | Family Medicine                              | Base       |              |         |
|                    | Orthopedics                                  | 0.28       | [0.02,3.67]  | 0.330   |
|                    | Internal Medicine                            | n.c.       |              |         |
|                    | PM&R                                         | 1.45       | [0.14,15.56] | 0.759   |
|                    | Pediatrics                                   | n.c.       |              |         |
|                    | Emergency Medicine                           | n.c.       |              |         |
|                    | Sports Medicine                              | n.c.       |              |         |
|                    | Other                                        | 1.56       | [0.09,28.28] | 0.762   |
|                    | Male physicians in practice the same or less | Odds Ratio | 95% CI       | p value |
| Age                |                                              | 0.95       | [0.89,1.02]  | 0.130   |
| Region             |                                              |            |              |         |
|                    | Europe                                       | Base       |              |         |
|                    | Africa                                       | n.c.       |              |         |
|                    | Asia                                         | n.c.       |              |         |
|                    | North America                                | n.c.       |              |         |
|                    | Oceania                                      | n.c.       |              |         |

|                                                |            |               |         |
|------------------------------------------------|------------|---------------|---------|
| South America                                  | n.c.       |               |         |
| Multiple                                       | n.c.       |               |         |
| Residency training                             |            |               |         |
| Family Medicine                                | Base       |               |         |
| Orthopedics                                    | 0.08       | [0.01,0.89]   | 0.039   |
| Internal Medicine                              | n.c.       |               |         |
| PM&R                                           | 0.26       | [0.02,3.33]   | 0.301   |
| Pediatrics                                     | 1.86       | [0.08,43.1]   | 0.699   |
| Emergency Medicine                             | n.c.       |               |         |
| Sports Medicine                                | n.c.       |               |         |
| Other                                          | 0.27       | [0.01,5.27]   | 0.384   |
| Female physicians in practice longer           | Odds Ratio | 95% CI        | p value |
| Age                                            | 0.95       | [0.90,1.01]   | 0.109   |
| Region                                         |            |               |         |
| Europe                                         | Base       |               |         |
| Africa                                         | 10.88      | [1.07,110.11] | 0.043   |
| Asia                                           | 1.38       | [0.25,7.62]   | 0.714   |
| North America                                  | 1.33       | [0.17,10.23]  | 0.785   |
| Oceania                                        | n.c.       |               |         |
| South America                                  | 7.45       | [0.89,62.22]  | 0.064   |
| Multiple                                       | n.c.       |               |         |
| Residency training                             |            |               |         |
| Family Medicine                                | Base       |               |         |
| Orthopedics                                    | 1.98       | [0.25,15.61]  | 0.517   |
| Internal Medicine                              | n.c.       |               |         |
| PM&R                                           | 1.66       | [0.25,10.91]  | 0.600   |
| Pediatrics                                     | n.c.       |               |         |
| Emergency Medicine                             | n.c.       |               |         |
| Sports Medicine                                | n.c.       |               |         |
| Other                                          | 3.20       | [0.21,48.20]  | 0.401   |
| Female physicians in practice the same or less | Odds Ratio | 95% CI        | p value |
| Age                                            | 0.96       | [0.92,1.01]   | 0.124   |
| Region                                         |            |               |         |
| Europe                                         | Base       |               |         |
| Africa                                         | 10.57      | [1.55,72.11]  | 0.016   |
| Asia                                           | 1.69       | [0.41,6.93]   | 0.465   |
| North America                                  | 0.43       | [0.06,3.22]   | 0.412   |
| Oceania                                        | n.c.       |               |         |
| South America                                  | 4.56       | [0.66,31.56]  | 0.124   |
| Multiple                                       | n.c.       |               |         |
| Residency training                             |            |               |         |
| Family Medicine                                | Base       |               |         |
| Orthopedics                                    | 2.06       | [0.29,14.45]  | 0.466   |
| Internal Medicine                              | 1.08       | [0.08,14.73]  | 0.955   |
| PM&R                                           | 2.46       | [0.36,16.61]  | 0.356   |
| Pediatrics                                     | 8.44       | [0.64,112.05] | 0.106   |
| Emergency Medicine                             | n.c.       |               |         |
| Sports Medicine                                | n.c.       |               |         |
| Other                                          | 2.27       | [0.15,33.73]  | 0.552   |
| Male athletic trainers                         | Odds Ratio | 95% CI        | p value |

|                               |            |                |         |
|-------------------------------|------------|----------------|---------|
| Age                           | 0.92       | [0.86,0.99]    | 0.020   |
| Region                        |            |                |         |
| Europe                        | Base       |                |         |
| Africa                        | 5.78       | [0.3,110.83]   | 0.245   |
| Asia                          | 17.16      | [1.29,227.36]  | 0.031   |
| North America                 | 0.32       | [0.02,5.54]    | 0.435   |
| Oceania                       | n.c.       |                |         |
| South America                 | 54.29      | [2.73,1077.57] | 0.009   |
| Multiple                      | n.c.       |                |         |
| Residency training            |            |                |         |
| Family Medicine               | Base       |                |         |
| Orthopedics                   | 0.11       | [0.01,1.14]    | 0.064   |
| Internal Medicine             | n.c.       |                |         |
| PM&R                          | 0.75       | [0.08,7.10]    | 0.799   |
| Pediatrics                    | 3.83       | [0.20,74.39]   | 0.376   |
| Emergency Medicine            | n.c.       |                |         |
| Sports Medicine               | n.c.       |                |         |
| Other                         | 0.51       | [0.03,9.89]    | 0.654   |
| Female athletic trainers      | Odds Ratio | 95% CI         | p value |
| Age                           | 0.94       | [0.89,0.99]    | 0.024   |
| Region                        |            |                |         |
| Europe                        | Base       |                |         |
| Africa                        | 6.29       | [0.72,55.07]   | 0.097   |
| Asia                          | 5.66       | [0.86,37.37]   | 0.072   |
| North America                 | 0.52       | [0.08,3.46]    | 0.502   |
| Oceania                       | n.c.       |                |         |
| South America                 | 6.30       | [0.44,90.86]   | 0.177   |
| Multiple                      | n.c.       |                |         |
| Residency training            |            |                |         |
| Family Medicine               | Base       |                |         |
| Orthopedics                   | 0.20       | [0.03,1.34]    | 0.098   |
| Internal Medicine             | 0.96       | [0.12,7.43]    | 0.965   |
| PM&R                          | 0.66       | [0.11,4.08]    | 0.651   |
| Pediatrics                    | 3.67       | [0.34,39.27]   | 0.283   |
| Emergency Medicine            | n.c.       |                |         |
| Sports Medicine               | n.c.       |                |         |
| Other                         | 0.58       | [0.04,7.97]    | 0.683   |
| Organizations/Administrations | Odds Ratio | 95% CI         | p value |
| Age                           | 0.92       | [0.86,0.99]    | 0.029   |
| Region                        |            |                |         |
| Europe                        | Base       |                |         |
| Africa                        | 29.80      | [2.54,349.89]  | 0.007   |
| Asia                          | 9.53       | [0.88,103.12]  | 0.064   |
| North America                 | 0.33       | [0.02,6.23]    | 0.461   |
| Oceania                       | n.c.       |                |         |
| South America                 | 15.40      | [0.65,363.96]  | 0.090   |
| Multiple                      | n.c.       |                |         |
| Residency training            |            |                |         |
| Family Medicine               | Base       |                |         |
| Orthopedics                   | 0.25       | [0.02,2.57]    | 0.241   |
| Internal Medicine             | n.c.       |                |         |

|                    |       |               |       |
|--------------------|-------|---------------|-------|
| PM&R               | 1.96  | [0.26,14.92]  | 0.517 |
| Pediatrics         | 10.13 | [0.54,189.77] | 0.121 |
| Emergency Medicine | n.c.  |               |       |
| Sports Medicine    | n.c.  |               |       |
| Other              | 1.16  | [0.06,21.31]  | 0.922 |

PM&R; physical medicine and rehabilitation, 95 % CI; 95 % confidence interval, n.c; not calculated
