# Supplementary material for: Gender bias in sports medicine: an international assessment of sports medicine physicians’ perceptions of their interactions with athletes, coaches, athletic trainers and other physicians
Source: HighWire-hosted journal article supplement (doi:10.1136/bjsports-2021-104695), 2022-06-23
Supplement: bjsports-2021-104695supp002_data_supplement.pdf [file bjsports-2021-104695supp002_data_supplement.pdf]

Female Athletes  
 Male Coaches  
 Female Coaches  
 Male physicians who have been in practice longer than you  
 Male physicians who have been in practice the same or less time than you  
 Female physicians who have been in practice longer than you  
 Female physicians who have been in practice the same or less time than you  
 Male Athletic trainer  
 Female Athletic trainer  
 Organization/Administration  
 (Ex Team Manager, Athletic Director)

- How comfortable are you with a female sports medicine physician working on the sidelines during her pregnancy?  
 To a great extent, Somewhat, Very little, Not at all
- Female physicians can continue to work as productively as male sports medicine physicians after giving birth  
 Strongly agree, Agree, Undecided, Disagree, Strongly disagree
- How satisfied are you with the percentage of sports medicine physicians that are female in your country?  
 To a great extent, Somewhat, Very little, Not at all
- Please rate your level of agreement with the following statements

|                                                                                                                   | Strongly Agree | Agree | Undecided | Disagree | Strongly disagree |
|-------------------------------------------------------------------------------------------------------------------|----------------|-------|-----------|----------|-------------------|
| MALE sports medicine physicians are better suited than their female counterparts to take care of MALE athletes.   |                |       |           |          |                   |
| MALE sports medicine physicians are better suited than their female counterparts to take care of FEMALE athletes. |                |       |           |          |                   |
| FEMALE sports medicine physicians are better suited than their male                                               |                |       |           |          |                   |

|                                                                                                                               |  |
|-------------------------------------------------------------------------------------------------------------------------------|--|
| counterparts to take care of<br>MALE athletes.                                                                                |  |
| FEMALE sports medicine<br>physicians are better suited<br>than their male<br>counterparts to take care of<br>FEMALE athletes. |  |
